# Supplementary material
Source: MDPI journal article supplement (https://www.mdpi.com/2311-5637/10/4/189)
Supplement: s1 [file s1 › fermentation-2907478-supplementary.pdf]

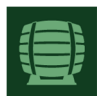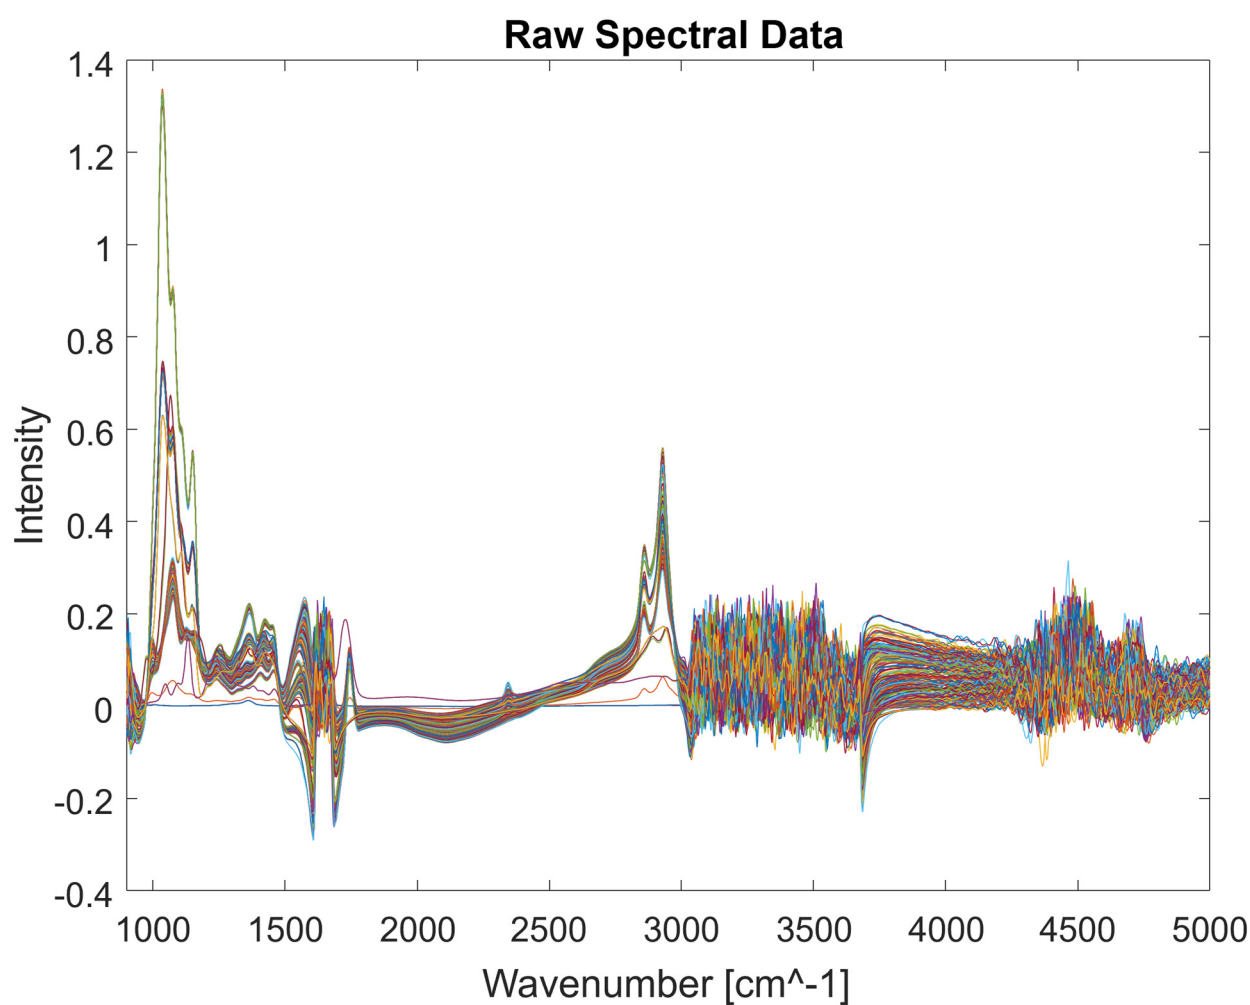

**Figure S1:** Raw spectra of all samples and variables of the main fermentation trial.

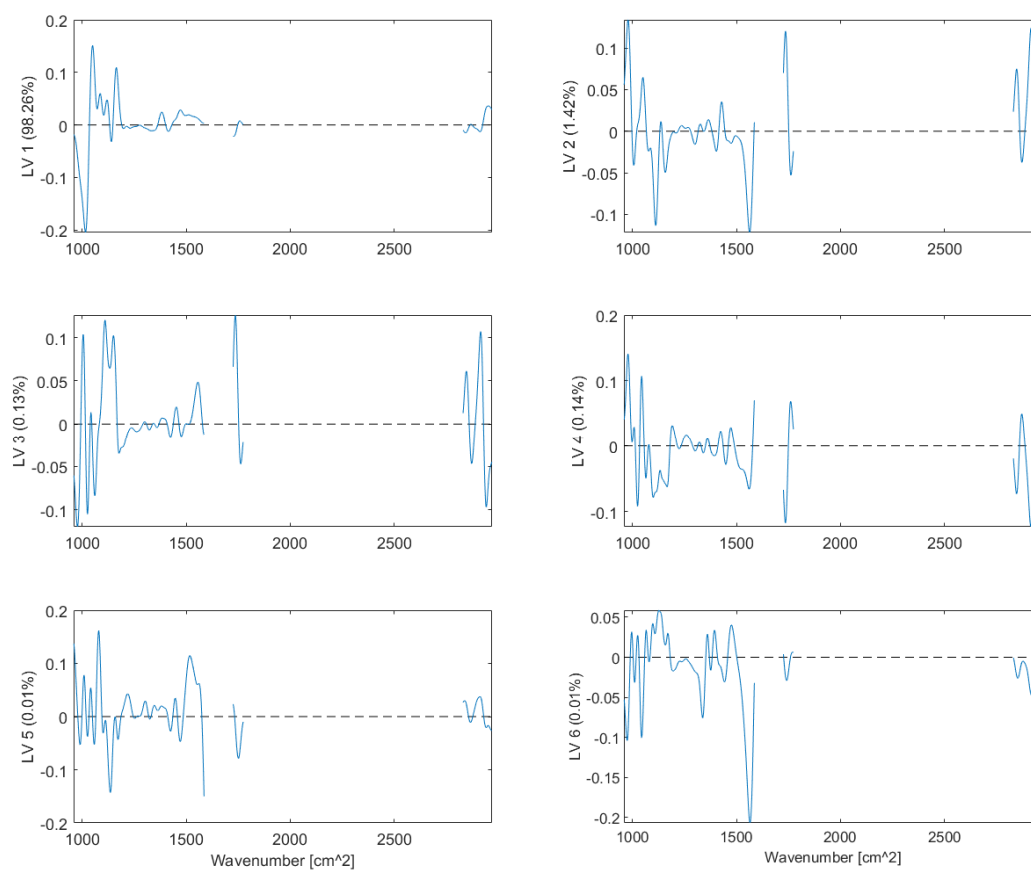

**Figure S2:** All six loadings for pH PLS model on all data.
